# Supplementary material
Source: publisher figshare collection journal article supplement (https://tandf.figshare.com/ndownloader/files/17337794)
Supplement: Supplementary file 1 [file 17337794]

Supplementary Table 3. Effects of bentonite addition and *Z. mays* cultivation on residual PCBi concentrations (ng g-1) in the soil containing 1200 ng ƩPCBi g-1 after 5 weeks of incubation.

| PCBi | without plant cultivation | | | With maize cultivation | | |
| --- | --- | --- | --- | --- | --- | --- |
| **B0* (Control)** | **B2*** | **B4*** | **B0** | **B2** | **B4** |
| CB5 | 14.2a | 14.0a | 14.1a | 10.53b | 10.0b | 8.04c |
| CB18 | 16.9a | 16.2a | 17.2a | 12.69b | 12.3b | 7.45c |
| CB31 | 36.4a | 36.5a | 36.1a | 22.31b | 19.1c | 13.5d |
| CB44 | 23.1a | 22.3a | 23.4a | 15.40b | 13.4b | 9.77c |
| CB52 | 8.59a | 7.97a | 7.90a | 7.81a | 6.14b | 4.25c |
| CB66 | 43.5a | 43.3a | 43.8a | 28.20b | 24.8c | 23.1c |
| CB87 | 136.0a | 137.1a | 136.2a | 88.26b | 73.5c | 61.5d |
| CB101 | 20.6a | 20.9a | 20.6a | 11.32b | 9.47c | 6.35d |
| CB110 | 70.0a | 67.6a | 67.95a | 43.62b | 36.5c | 31.1d |
| CB138 | 60.2a | 59.6a | 59.7a | 40.91b | 34.5c | 26.4d |
| CB141 | 243.3a | 238.7a | 205.1b | 197.3b | 158.4c | 131.5d |
| CB151 | 51.8a | 49.8a | 52.57a | 38.43b | 28.4c | 19.8d |
| CB153 | 59.7a | 58.5a | 58.81a | 41.06b | 33.8c | 27.4d |
| CB170 | 65.1a | 64.5a | 64.37a | 36.73b | 30.8c | 25.0d |
| CB180 | 40.6a | 40.7a | 40.70a | 29.67b | 26.1c | 23.1c |
| CB183 | 160.4a | 160.8a | 160.8a | 131.6b | 106.8c | 88.8d |
| CB187 | 88.6a | 87.5a | 87.9a | 53.6b | 51.1b | 41.2c |

Different letters in each row represent signiﬁcant differences with Tukey test (P< 0.05).

*: B0: no bentonite addition, B2: 2% bentonite addition, B4: 4% bentonite addition
